# Supplementary material for: Retraction: Lehman, D., Stanton, J., and Alire, D. (2011). “Seismic Evaluation of Beam-Column Joints in Older Concrete Exterior Frames.” J. Struct. Eng. , 10.1061/(ASCE)ST.1943-541X.0000463 (June 17, 2011)
Source: Atypon-hosted journal article supplement (doi:10.1061/(asce)st.1943-541x.0001566), 2016-04-09
Supplement: retracted_manuscript_st.1943-541x.0000463.pdf [file retracted_manuscript_st.1943-541x.0000463.pdf]

1  
2  
3  
4 **Seismic Evaluation of Beam-Column Joints in**  
5  
6 **Older Concrete Exterior Frames**  
7  
8  
9

10  
11 **Dawn Lehman<sup>1</sup>, John Stanton<sup>2</sup>, and Daniel Alire<sup>3</sup>**  
12  
13  
14

15  
16 **ABSTRACT**  
17  
18

19 This paper describes an experimental study on beam-column joints in older reinforced  
20 concrete exterior frames subjected to seismic loading. Because joints in pre-1970s construction  
21 were not designed using modern seismic design guidelines, they typically contain no transverse  
22 reinforcement and may be subjected to a wide range of levels of joint shear stress demand. In  
23 current codes and recommendations for seismic design and evaluation, simple expressions are  
24 used typically to design the joint, and a strut-mechanism approach has been adopted to assess the  
25 strength. However, prior and ongoing research has shown that joint behavior is more  
26 complicated than implied by these documents and that defining failure by static strength alone is  
27 not sufficient to describe performance.  
28  
29  
30  
31  
32  
33  
34  
35  
36  
37  
38  
39

40  
41 A previous experimental research study, conducted by the principal investigators, has  
42 demonstrated that the joint response depends on several parameters, including the demand  
43 history. To investigate in greater detail the influence of the joint shear stress demand on the  
44 response, the research study described herein was conducted. The data from the two programs  
45 were then combined to establish probabilistic relationships between joint damage and  
46  
47  
48  
49  
50  
51  
52

53  
54  
55 

---

<sup>1</sup> Department of Civil and Environmental Engineering, University of Washington, Seattle WA  
56

57 <sup>2</sup> Department of Civil and Environmental Engineering, University of Washington, Seattle WA  
58

59 <sup>3</sup> KPF Consulting Engineers, Seattle WA  
60  
61  
62  
63  
64  
65

1  
2  
3  
4 Engineering Demand Parameters, such as shear stress and strain, and to obtain estimates of joint  
5  
6 stiffness for use in the seismic analysis of older structures.  
7  
8

9 **Subject Headings:** Seismic Evaluation, Beam-Column Joints, Reinforced Concrete Frames,  
10  
11 Performance-Based Design  
12  
13

## 14 **INTRODUCTION**

15  
16  
17 Significant shear forces develop in the joints of reinforced concrete moment frames that  
18 are subjected to seismic loading. In frames built before the mid-1970s, the joints typically  
19  
20 contain no transverse reinforcement, so the shear resistance must be developed by the concrete  
21  
22 alone. The joint shear demands also vary considerably from one structure to another.  
23  
24 Contemporary joints contain transverse reinforcement and experience joint shear stress demands  
25  
26 that are limited by code requirements, but they are still susceptible to seismic damage. It is  
27  
28 therefore logical to expect the joints in older frames to be even more vulnerable (Mosier 2000).  
29  
30  
31  
32

33  
34 Most previous studies have concentrated on joints that contain transverse reinforcement,  
35  
36 with the objective of improving joint response. However, a large number of older reinforced  
37  
38 concrete frames exist and these frames lack joint reinforcement. Limited research has been  
39  
40 conducted on such joints, and data are needed to support the development and refinement of  
41  
42 guidelines for evaluating them.  
43  
44  
45

46  
47 ASCE-41 (2007), which is based on FEMA 356 (2000), provides a model for predicting  
48  
49 the joint shear response, but Walker (2001) demonstrated its shortcomings. The first of these is  
50  
51 that it conservatively predicts strength which will result in some joints that are seismically  
52  
53 adequate to be deemed deficient. The economic consequences of such a conservative model can  
54  
55 be significant because retrofitting joints is labor-intensive and expensive. The second major  
56  
57 shortcoming is that the ASCE-41 guidelines, like the corresponding design rules for joints in  
58  
59  
60  
61

1  
2  
3  
4 ACI 318-08 (2008), treat joint shear strength as a single, static value that depends on the concrete  
5 strength. Mosier (2000) surveyed the research literature on joints with and without transverse  
6 reinforcement and found that the shear strength was a function of several parameters, particularly  
7 the cyclic loading history, i.e., amplitude, number, and symmetry of loading cycles.  
8 Experimental work by Walker (2001) subsequently confirmed this finding for joints without  
9 transverse reinforcement.  
10  
11  
12  
13  
14  
15  
16  
17

18  
19 The research conducted by Mosier and Walker identified several unresolved questions  
20 related to joint capacity. The first concerns the relationship between the cyclic joint shear  
21 strength and the concrete compressive strength,  $f'_c$ . In the United States, most seismic design  
22 and evaluation documents for beam-column joints in buildings, e.g., ACI 318-08 (2008), FEMA  
23 356 (2000), and IBC (2003), suggest that the shear strength is related to  $\sqrt{f'_c}$ , but specifications in  
24 other countries (e.g., NZ 3101 2006) are based on other, different relationships. The differences  
25 between these various approaches become important when the concrete strength is high. In older  
26 buildings, the concrete strength will have increased over time, so an understanding of the effects  
27 of process on the joint response is needed (Wood 1992).  
28  
29  
30  
31  
32  
33  
34  
35  
36  
37  
38  
39  
40

41 A second important issue is that joints tend to degrade gradually, rather than collapsing  
42 suddenly, which implies that acceptable joint shear stress and strain limits should be a function  
43 of the acceptable damage level. Because damage is a qualitative measure, a relationship is  
44 needed between it and quantitative engineering demand parameters (EDPs), such as joint shear  
45 stress or strain, if it is to be used for seismic evaluation.  
46  
47  
48  
49  
50  
51  
52

53 Finally, guidance is needed for the value of the joint shear stiffness to be used in analyses  
54 of older frames. Walker (2001) showed that the joint deformations could contribute more than  
55 half of the total story drift, in which case frame analyses that use rigid joints are likely to  
56  
57  
58  
59  
60  
61  
62  
63  
64  
65

1  
2  
3  
4 underestimate the story drift. Models that account for degradation in the joint stiffness are  
5  
6 therefore needed.  
7

8  
9 The objectives of the study reported here are to address these three topics using both  
10 experimental and analytical means. The experimental research study was developed to study the  
11 influence of a wide range of shear stress demand levels in joints without transverse  
12 reinforcement. These data were then combined with the research results from Walker (2001) to  
13  
14 develop relationships among the critical parameters for use in the seismic evaluation of older  
15 frame structures. The results of this research form a basis for evaluating the seismic performance  
16 of joints in older reinforced concrete frames. The advances in understanding of joint behavior,  
17 the estimates of joint shear stiffness, and the relationships between damage and EDPs provide  
18 engineers with evaluation tools that represent a significant improvement over those presently  
19 available. The experimental results also provide a basis for development and calibration of  
20 analytical models.  
21  
22  
23  
24  
25  
26  
27  
28  
29  
30  
31  
32  
33  
34

### 35 36 37 **TEST PROGRAM**

38  
39 Relatively experimental programs have simulated beam-column joints in older  
40 construction that lack transverse reinforcement. Two test programs were carried out to fill this  
41 gap in knowledge, and each addressed a different aspect of the problem. Table 1 provides a  
42 summary of the two test series, designated as Series 1 and 2 and described in detail by Walker  
43 (2001) and Alire (2002), respectively. The naming system for the tests is common to both series,  
44 and is as follows. The first four characters define the loading history (described below and shown  
45 in Figure 1). Of the four numbers that follow, the first two define the ratio of target joint shear  
46 stress to concrete strength,  $v_j/f'_c$ , and the last two define the target concrete strength in hundreds  
47  
48  
49  
50  
51  
52  
53  
54  
55  
56  
57  
58  
59  
60  
61  
62  
63  
64  
65

1  
2  
3  
4 of psi. (No decimal points are used.) Thus test PADH-1450 uses the PADH loading history, has  
5  
6 a target joint shear stress of  $0.14f'_c$ , and a target concrete strength of 5000 psi (35 MPa).  
7  
8

9 The complete set of study parameters consisted of the joint shear stress demand, the  
10 displacement history, and the concrete strength. The Series 1 tests were reported by Walker  
11 (2001) and were designed to investigate the influence of displacement history on joint response.  
12  
13 Seven specimens were tested using four different displacement histories, shown in Figure 1 and  
14 indicated in Table 1. The histories included a Symmetric Cyclic Displacement History (SCDH)  
15 with monotonically increasing levels of drift, two histories with Constant Drift-ratio amplitudes  
16 of 1.5% and 3.0% (CD15 and CD30) and a Pulse-type Asymmetric Displacement History  
17 (PADH). The two target joint shear stress demand coefficients  $v_j/f'_c$  were approximately 0.82  
18 and 1.29 (MPa). The lower level corresponds to the FEMA-356 joint shear strength limit, and the  
19 upper level represents the ACI 318-08 joint shear strength limit. Therefore the two SCDH  
20 specimens from Series 1 served as reference specimens for the Series 2 tests, as indicated in  
21 Table 1.  
22  
23  
24  
25  
26  
27  
28  
29  
30  
31  
32  
33  
34  
35  
36  
37

38 The Series 2 tests were conducted by Alire (2002) and are described in this paper. They  
39 were designed to investigate the influences of concrete strength and joint shear stress demand.  
40  
41 Mosier (2000) reviewed 15 structures built on the West Coast of the US between 1920 and 1979,  
42 and found joint shear stress demands that ranged between  $0.19\sqrt{f'_c}$  and  $2.18\sqrt{f'_c}$  MPa ( $2.3\sqrt{f'_c}$  and  
43  $26.3\sqrt{f'_c}$  psi). Very different responses should be expected at the highest and lowest stresses  
44 within this wide range. When the joint shear stress is low, the joints will remain relatively  
45 undamaged and the majority of the inelastic component of the drift will result from yielding of  
46 the beams. This mode of response is ductile, and is the one that contemporary joint designs are  
47 intended to achieve. At intermediate joint shear stress values, the beams will yield and the joint  
48  
49  
50  
51  
52  
53  
54  
55  
56  
57  
58  
59  
60  
61  
62  
63  
64  
65

1  
2  
3  
4 will also suffer some damage, while, at high joint shear stresses, the joint may incur significant  
5 damage without the beam yielding. The boundaries between these behaviors, expressed in terms  
6 of joint shear stress level and other parameters, are at present unclear.  
7  
8  
9

10  
11 For Series 2, four specimens without joint transverse reinforcement were built with target  
12 joint shear stress demands ranging from  $0.47\sqrt{f'_c}$  to  $2.41\sqrt{f'_c}$  MPa ( $5.7\sqrt{f'_c}$  to  $29.0\sqrt{f'_c}$  psi), as  
13 indicated in Table 1. The Series 2 specimens were designed to complement Specimens SCDH-  
14 1450 and SCDH-2250 of Series 1 with respect to the target joint shear stress demand (0850 and  
15 4150) or concrete strength (0995 and 1595), so as to investigate in greater detail the influence of  
16 these parameters. (Table 1 shows that, in Specimen SCDH-0850, the measured joint shear stress  
17 was significantly higher than the target value. This occurred because the beam bars strain-  
18 hardened significantly). The target joint shear stress demands were chosen to investigate the  
19 boundaries between the three different behaviors identified above (beam hinging alone,  
20 combined beam hinging and inelastic joint deformation, and joint deformation alone).  
21  
22  
23  
24  
25  
26  
27  
28  
29  
30  
31  
32  
33  
34  
35

36 Older reinforced concrete frames often contain vulnerabilities in addition to the lack of  
37 transverse joint reinforcement. The beams may be offset from the columns, the beam or column  
38 shear strengths may be insufficient, the bar splices may be inadequate, etc. Because the goal of  
39 this study was to investigate joint shear performance, these other failure mechanisms were  
40 prevented by using heavy beam and column ties, a column depth of at least 20-bar diameters,  
41 continuous beam and column bars, and a column-to-beam flexural strength ratio of  
42 approximately 1.4. (In Specimen CDH-4150, bar congestion limited the amount of column steel  
43 that could be placed, and consequently the ratio was approximately 1.0). The axial-load ratio  
44 was maintained at 0.1 to approximate the average value of 0.12 found in practice by Mosier  
45 (2000).  
46  
47  
48  
49  
50  
51  
52  
53  
54  
55  
56  
57  
58  
59  
60  
61  
62  
63  
64  
65

1  
2  
3  
4 Table 2 and Figure 2 indicate the reinforcement and geometry used for the Series 2 test  
5 specimens. The specimens were approximately two-thirds of full scale, where full-scale was  
6 defined by a representative building selected by Walker. As indicated in Figure 2, the beams  
7 were 400 mm wide by 500 mm deep (16 in. by 20 in.), and the columns were 400 mm wide by  
8 450 mm deep (16 in. by 18 in.) The different target joint shear stress demands were achieved by  
9 selecting appropriate beam longitudinal reinforcement. For Specimen SCDH-1595, high-strength  
10 beam reinforcement manufactured by MMFX Technologies Corp. was used to maintain the same  
11 bond demand ratio as in the other specimens, so the ratio of  $h_c$  to  $d_b$  exceeded 20 in that  
12 specimen.  
13  
14  
15  
16  
17  
18  
19  
20  
21  
22  
23  
24  
25

26 The SCDH displacement history (Figure 1a), used by Walker on two of his specimens,  
27 was used on all four specimens in Series 2 to facilitate comparison with the results of other  
28 research. It consisted of 30 symmetric cycles, divided into 10 drift ratio levels of increasing  
29 amplitude and included the following drift cycles if the specimen sustained sufficient the residual  
30 lateral capacity: 0.1%, 0.25%, 0.5%, 0.75%, 1.0%, 1.5%, 2.0%, 3.0%, 4.0% and 5.0%.  
31  
32  
33  
34  
35  
36  
37  
38

### 39 **Material Properties**

40  
41 The concrete and steel properties were determined from materials tests and are  
42 summarized in Tables 1 and 3. During construction, 150 x 300 mm (6 x 12 in.) concrete  
43 cylinders were cast and were cured in sealed molds for 24 hours with the test specimens, then  
44 stripped and transferred to a fog room at constant temperature and humidity. The compressive  
45 strength was determined on the day of test. The properties of the reinforcing steel were obtained  
46 from tension tests. The Raynor (2001) constitutive model was then fitted to the data for purposes  
47 of analysis.  
48  
49  
50  
51  
52  
53  
54  
55  
56  
57  
58  
59  
60  
61  
62  
63  
64  
65

## Test Set-up and Instrumentation

The test setup and instrumentation used during testing were identical to those of Walker (2001). During testing, the top and bottom of the column were fixed against translation, while equal and opposite vertical displacements were imposed at the beam tips. The beam displacements were measured using linear variable differential transformers (LVDTs) to allow the interstory drift to be calculated. The column shear forces were measured with load cells. Pressure transducers measured the beam shears because of space limitations.

The joint deformations were measured using a purpose-built rig attached to four threaded rods embedded in the core concrete. Taping and oiling the rods prior to casting minimized any confinement that the rod might otherwise have applied to the joint. Two horizontal, two vertical, and two diagonal LVDTs were attached to the rods to create the joint shear rig, as shown in Figure 2. Values of the shear strain were calculated using instruments located with each of the four triangles in the rig and the results were then averaged. Further description of the instrumentation used to monitor all of the sub-assembly components may be found in Walker (2001) and Alire (2002).

## EXPERIMENTAL RESULTS

### Qualitative Observations

Both qualitative observations and instrumental measurements were obtained from the experiments. In particular, qualitative observations were made for three subjective damage states, and were then used to develop probabilistic relationships between the level of joint damage and quantitative EDPs such as strain and drift ratio. The damage states recorded were:

1. *Center Joint Cracking* in which diagonal cracks first appeared at the center of the joint,



- 1
- 2
- 3
- 4 2. *Initial Spalling* of the joint cover concrete, and
- 5
- 6
- 7 3. *Extreme Spalling*, defined here as exposure of the center column bar.
- 8

9 These damage states represent a subset of those reported by Pagni and Lowes (2006).  
10  
11 Figure 3 shows examples of the latter two damage states; Table 4 and Figure 4 show the drift  
12 ratios at which they were reached. The drift level reported is the peak drift achieved during the  
13 cycle in which the damage state was observed. Because qualitative observations were made only  
14 at the cycle peaks, when the loading was temporarily stopped, the recorded drift ratio is an upper  
15 bound to the one at which the event occurred.  
16  
17  
18  
19  
20  
21  
22

23 Center Joint Cracking provided the first observable damage to the joint. The damage  
24 occurred between 0.25% and 0.75% drift, with the exception of Specimen SCDH-0850, for  
25 which it occurred at 2.0% drift. These relatively low drift levels suggest that, unless the joint  
26 shear stress demand is exceptionally low, beam-column joints will experience some cracking,  
27 even during moderate earthquakes.  
28  
29  
30  
31  
32  
33  
34

35 The Initial Spalling damage state occurred between 1.5% and 3.0% drift and, within that  
36 range, a higher joint shear stress demand led to spalling at a lower drift ratio. Extreme Spalling  
37 occurred between drift ratios of 2.0% and 5.0% and typically occurred at the same time that peak  
38 joint shear stress was reached. Both increasing the applied drift ratio and cycling at a constant  
39 drift ratio exacerbated the extent of spalling.  
40  
41  
42  
43  
44  
45  
46

47 The nature of the damage accumulation in the test specimen with low joint shear stress  
48 demand (SCDH-0850) differed from that in all of the other test specimens. In Specimen SCDH-  
49 0850, joint damage began around the perimeter of the joint in a diamond pattern rather than in  
50 the X-pattern that was observed in the other test specimens. Furthermore, joint damage started  
51 later in the displacement history, and it was less extensive, than was the case for the other  
52  
53  
54  
55  
56  
57  
58  
59  
60  
61  
62  
63  
64  
65

1  
2  
3  
4 specimens. This result indicates that low joint shear stress demand can limit the joint damage and  
5  
6 improve the frame performance.  
7  
8

## 9 10 **Measured Data**

11  
12 The measured data were reduced to give the relationship between the cyclic joint shear  
13 stress ( $v_j$ ) and the joint shear strain ( $\gamma$ ). That relationship was used, in turn, to evaluate the secant  
14 joint shear modulus,  $G_{sec}$ , and salient  $v_j$  and  $\gamma_j$  values corresponding to the selected damage states  
15 for each specimen.  
16  
17  
18  
19  
20  
21

22 The measured responses are presented both at the sub-assembly level in the form of  
23 column shear force vs. system drift, and at the local level, as average joint shear stress vs. strain  
24 relationships. Figure 4 shows the force-drift response curves for specimens SCDH-0850 and  
25 SCDH-4150. The measured force-displacements responses indicate that the displacement  
26 ductility at maximum lateral load capacity ranged from 9.5 (yield and ultimate drifts of 0.42%  
27 and 4.0%) for Specimen SCDH-0850 to 1.2 for Specimen SCDH-4150 (yield and ultimate drifts  
28 of 1.75% and 2%). In defining displacement ductility, the yield displacement was defined as the  
29 displacement corresponding to initial yield, as measured from the strain gages, and the ultimate  
30 displacement was taken as that at which the lateral load reached peak value. Since all specimens  
31 were subjected to the same displacement history, the large range of displacement ductility  
32 capacities indicates very different contributions of the joint shear deformation to the total drift  
33 (Alire 2002). For that reason, joint shear stress and strain provide a better description of the joint  
34 behavior than does a global demand parameter such as displacement ductility.  
35  
36  
37  
38  
39  
40  
41  
42  
43  
44  
45  
46  
47  
48  
49  
50  
51  
52

53 The low level of joint damage and extensive beam yielding in Specimen SCDH-0850  
54 suggest that that specimen lay approximately at the boundary between a joint-shear dominated  
55 and beam-hinging dominated response mode. Similarly, the essentially elastic behavior of the  
56  
57  
58  
59  
60  
61  
62  
63  
64  
65

1  
2  
3  
4 beams in Specimen SCDH-4150 suggests that its peak joint shear stress was not controlled by  
5  
6 beam bar yielding and therefore that its joint shear strength represents approximately the  
7  
8 maximum possible joint shear capacity.  
9

10  
11 The cyclic joint shear stress-joint shear strain ( $v_j$  vs.  $\gamma_j$ ) results are shown in Figure 5.  
12  
13 Selected damage states discussed earlier are shown on the figures. The results illustrate several  
14  
15 important behavioral characteristics, as described below.  
16  
17

- 18  
19 1. In all cases, the peak measured joint shear stress achieved was equal to or exceeded the  
20  
21 nominal joint shear stress demand, which was calculated from the beam bar forces using  
22  
23 a stress of  $1.25f_y$ . At the end of the test (5% drift), the load was lower than the peak load,  
24  
25 so all the specimens may be considered to have reached their lateral drift capacity in the  
26  
27 sense that they had lost strength relative to their peak load. This result shows  
28  
29 conclusively that joint shear strength is not solely a function of concrete strength. If it  
30  
31 were, Specimen SCDH-1595 would have displayed a much higher peak load than  
32  
33 Specimen SCDH-4150, because the joints were the same size but made of concretes with  
34  
35 nominal strengths of 66 and 35 MPa (9500 and 5000 psi), respectively. In fact, the  
36  
37 opposite occurred and Specimen SCDH-4150 carried the higher peak load. It would be  
38  
39 reasonable to ask whether this result might have been caused by some other component,  
40  
41 such as the beam strength, controlling the peak load and the failure mode. However, this  
42  
43 was definitely not the case. In both specimens, the joints suffered extensive damage, of a  
44  
45 type that indicated high shear and bond demands, and at the end of the tests the joint  
46  
47 shear deformations were responsible for the majority of the drift. By contrast, in the  
48  
49 beams and columns, typical signs of failure such as bar buckling and fracture were  
50  
51 completely absent.  
52  
53  
54  
55  
56  
57  
58  
59  
60  
61  
62  
63  
64  
65

- 1  
2  
3  
4  
5  
6  
7  
8  
9  
10  
11  
12  
13  
14  
15  
16  
17  
18  
19  
20  
21  
22  
23  
24  
25  
26  
27  
28  
29  
30  
31  
32  
33  
34  
35  
36  
37  
38  
39  
40  
41  
42  
43  
44  
45  
46  
47  
48  
49
2. At all levels of joint shear stress demand, the joint shear stress did not drop suddenly but rather remained nearly constant for several levels of applied cyclic drift.
  3. A comparison of the cycles at a given drift ratio (indicated on the individual plots in Figure 5) shows that, following initial spalling of the joint, the two specimens with intermediate stress demands (SCDH-0995 and SCDH-1595) showed a marked increase in joint shear strain, even though the drift remained constant for two more cycles. This behavior may be explained by the change in the relative stiffness values of the beam and joint and the susceptibility of the joint to damage. In Specimen SCDH-0850, the joint suffered relatively little degradation, so its stiffness remained nearly constant throughout the three cycles of each set, and the apportionment of drift between beam flexural deformations and joint shear deformations remained relatively constant as well. In Specimens SCDH-0995 and SCDH-1595, the higher joint shear stress led to cyclic degradation of the joint, so its secant stiffness dropped, whereas that of the beam stayed relatively constant. Thus, during the second and third cycles of the set, a larger proportion of the total drift was caused by joint deformation and the joint shear strain consequently increased. In Specimen SCDH-4150 the joint shear stress was so high that joint deformations accounted for a large portion of the drift, even in the first cycle, so they changed little during the second and third cycles of the set for most of the drift cycles.

50  
51  
52  
53  
54  
55  
56  
57  
58  
59  
60  
61  
62  
63  
64  
65

These observations show the need for a basis for quantifying joint performance that reflects the observed behavior better than does a model solely based on joint shear, e.g. the FEMA 356 model. Figure 6 shows the relationship among drift ratio, normalized joint shear stress (defined as  $v_j/\sqrt{f'_c}$ ) and damage states, for all the SCDH specimens. Each curve

1  
2  
3  
4 corresponds to a single damage state. (For states in which specimens SCDH-0995 and SCDH-  
5  
6 1595 overlie one another, only five (5) points appear.)  
7  
8

9 The curves are separated vertically and slope down to the right, implying that damage is a  
10 function of both joint shear stress demand and drift. The slopes are relatively small, which  
11 suggests that drift ratio is the more important variable. However, joint shear stress also plays a  
12 role. This may be illustrated by considering the damage corresponding to 2% drift. For low  
13 applied stress, the joint suffers little damage. For example, at this drift level Specimen SCDH-  
14 0850 had just experienced Center Joint Cracking. If a higher drift level, say 3%, were used, the  
15 peak permissible shear stress needed to limit the damage to Center Joint Cracking could be  
16 obtained by back-projecting the curve. Unfortunately the first cracking curve is extremely non-  
17 linear, so such back-projection is not quantitatively robust, but the joint shear stress would  
18 clearly have to be less than the  $0.47\sqrt{f_c}$  (MPa target), or  $0.71\sqrt{f_c}$  (MPa measured), experienced  
19 by Specimen SCDH-0850. At the other extreme, the highly stressed Specimen SCDH-4150  
20 sustained significant joint damage (Extreme Spalling) at 2% drift ratio. In that specimen, the  
21 beam bars yielded just as the peak load was reached. This suggests that the specimen could not  
22 have carried a joint shear stress much higher than the target value,  $2.4\sqrt{f_c}$  (MPa), or measured  
23 value,  $2.1\sqrt{f_c}$ . These two specimens thus define approximately the limits of the two independent  
24 damage modes: beam hinging and joint shear. Confirmation of this finding, by means of further  
25 experiments with different joint shear stress demands and concrete strengths, is desirable.  
26  
27  
28  
29  
30  
31  
32  
33  
34  
35  
36  
37  
38  
39  
40  
41  
42  
43  
44  
45  
46  
47  
48  
49

50  
51 Figure 6 also shows the limits specified in FEMA-356 (2001) and ACI-318-08 (2008),  
52 which express the joint design in terms of joint shear stress alone. In design, the story drift ratio  
53 is usually limited to approximately 2%, and this value can be used to illustrate the suitability of  
54 the FEMA and ACI limits. If the design is intended to avoid joint damage altogether, Figure 6  
55  
56  
57  
58  
59  
60  
61  
62  
63  
64  
65

1  
2  
3  
4 shows that even the FEMA joint shear stress limit of  $0.83\sqrt{f'_c}$  MPa ( $10\sqrt{f'_c}$  psi) is too liberal,  
5  
6 because the joint will suffer Center Joint Cracking before the 2% drift is reached. However, if  
7  
8 Extreme Spalling is considered acceptable, then even the ACI limit is much too restrictive,  
9  
10 because the joint shear stress limit could be increased to approximately  $2.1\sqrt{f'_c}$  (MPa) before the  
11  
12 damage exceeded the permissible state. This latter situation might result in joints being  
13  
14 retrofitted unnecessarily.  
15  
16  
17

18  
19 These results indicate that the seismic performance evaluation of joints in existing  
20  
21 reinforced concrete frames cannot be based on a single level of joint shear stress. A relationship  
22  
23 is needed between the demands, including both frame deformation and joint shear stress, and the  
24  
25 acceptable damage state.  
26  
27

28  
29 Development of a universal relationship for all joints is not straightforward. Evaluation of  
30  
31 the joint performance in the intermediate range of the joint shear stress is not a simple matter, as  
32  
33 indicated in Figure 6. The specimens within the joint shear stress ratio range of 0.7 to  $1.3\sqrt{f'_c}$   
34  
35 (MPa) do not show a strong trend with regard to the normalized joint shear stress demand.  
36  
37 However, this is the range in which most joints will lie. Further difficulties are caused by the  
38  
39 fact that the strength degrades with cycling, and that the extent of bar yielding (with its  
40  
41 implications for degradation of bond strength) may also be important.  
42  
43  
44

45  
46 To illustrate this, consider the normalized joint shear stress–drift response envelopes  
47  
48 shown in Figure 7. The envelopes for specimens SCDH-0995 and SCDH-1450 were almost  
49  
50 identical, even though Specimen SCDH-0995 suffered more joint damage than did Specimen  
51  
52 SCDH-1450 at the same drift ratio. This difference may be due to the smaller bond stress  
53  
54 demand in Specimen SCDH-0995, which in turn may have resulted in a lower bar-slip  
55  
56 component at a similar joint shear strain. Thus, evaluation of the joint performance may require  
57  
58  
59  
60  
61  
62  
63  
64  
65

1  
2  
3  
4 consideration of parameters in addition to joint shear stress demand, including the cyclic drift  
5  
6 and/or joint shear strain history and the bond demand on the beam bars.  
7  
8  
9

## 10 **CUMULATIVE PROBABILITY CURVES FOR DAMAGE EVALUATION**

11  
12  
13 The test results indicate that there is a link between the level of joint shear stress,  
14  
15 accumulated joint deformation, and the specified level of damage. Therefore, to achieve the  
16  
17 goals of performance-based seismic engineering, relationships between these demand parameters  
18  
19 and damage must be developed. In the interest of obtaining approximate relationships now,  
20  
21 simple statistical relationships between damage levels and EDPs such as joint shear strain and  
22  
23 drift were developed using the combined experimental results. Approximate joint stiffness  
24  
25 values for use in analyses of frames are discussed in the following section. A complete  
26  
27 description of such a relationship requires an extensive modeling effort, and may also require  
28  
29 additional testing.  
30  
31  
32  
33

34  
35 To quantify performance, relationships between damage and EDPs, using Cumulative  
36  
37 Probability Curves (CPC), were derived. The damage states of Center Joint Cracking, Initial  
38  
39 Spalling, and Extreme Spalling were related to several EDPs. Since engineers often use global  
40  
41 demand parameters such as interstory drift ratio and displacement ductility (e.g., FEMA 356),  
42  
43 these EDPs were considered. However, the previous analysis of the data suggests that joint shear  
44  
45 stress and strain are more appropriate variables with which to evaluate joint damage. Therefore,  
46  
47 these parameters were also used to develop CPCs.  
48  
49  
50

51  
52 The mean and coefficient of variation (COV) of the data were used to determine the most  
53  
54 appropriate parameter. For each EDP, mean and COV values are provided in Table 5. In  
55  
56 Figures 8 through, 10, only CPCs for the best demand parameter are presented for each damage  
57  
58 state. Curves for the other parameters may be found in Alire (2002).  
59  
60  
61  
62  
63  
64  
65

1  
2  
3  
4 For Center Joint Cracking, much the lowest COV (29%) was provided by the normalized  
5 joint shear stress demand at cracking, which suggests that Center Joint Cracking is more closely  
6 correlated with joint shear stress than with any other parameter. For the specimens tested, the  
7 mean joint shear stress at cracking was 86% of the  $0.625\sqrt{f'_c}$  (MPa) that ACI318-08 defines as  $f_r$ ,  
8 the modulus of rupture. Table 5 shows that a slightly better correlation still was obtained by  
9 normalizing  $v_j$  with respect to  $\sqrt{f'_c}$  rather than  $f_r$ . Figure 8 shows the Cumulative Probability  
10 Curve for the Center Joint Cracking as a function of normalized joint shear stress.  
11  
12  
13  
14  
15  
16  
17  
18  
19  
20

21 The other two damage states considered, Initial Spalling and Extreme Spalling, are  
22 defined by the extent of damage to the joint. Joints with Initial Spalling damage state are  
23 generally repairable. CPC relations were developed for drift ratio, displacement ductility, and  
24 joint shear strain for these two damage states. For Initial Spalling, the smallest COV (34%) was  
25 found using the local EDP of joint shear strain. On average, this damage state occurred at a joint  
26 shear strain of 0.011 rad. Figure 9 shows the relationship between Initial Spalling and joint shear  
27 strain.  
28  
29  
30  
31  
32  
33  
34  
35  
36  
37

38 Extreme Spalling represents a damage state at which the joint would need to be replaced.  
39 All of the test specimens eventually exhibited damage patterns that could be categorized as  
40 Extreme Spalling. Extreme Spalling was correlated with drift, displacement ductility, and joint  
41 shear strain. Analysis of the data shows that, if all the specimens are used, the Extreme Spalling  
42 CPCs are most closely correlated to drift, because it leads to the smallest COV. However, if only  
43 the SCDH specimens are considered, joint shear strain proves to be the better indicator. Joint  
44 shear strain is the recommended parameter because use of specimens subjected to the same drift  
45 history (i.e. SCDH) minimizes the effects of the demand history, which have already been shown  
46 to influence the response (Walker 2001). Figure 10 illustrates the difference.  
47  
48  
49  
50  
51  
52  
53  
54  
55  
56  
57  
58  
59  
60  
61  
62  
63  
64  
65



1  
2  
3  
4 The foregoing discussion showed that local demand parameters, such as joint shear stress  
5  
6 and strain, provide better estimates of local damage than do global parameters, such as drift. This  
7  
8 conclusion is based largely on the COV of the measured values of the different EDPs at the  
9  
10 damage state of interest. It is also consistent with the fact that the global parameters include  
11  
12 components of unrelated response components, (e.g. story drift includes a component due to  
13  
14 beam bending), and so should be expected to correlate less well.  
15  
16  
17  
18

## 19 **EVALUATION OF JOINT SHEAR STIFFNESS**

20  
21  
22 In none of the eleven joints did the joint become unable to carry the column axial load,  
23  
24 nor did the lateral stiffness drop to zero. In that formal sense, no joint collapsed. Thus, to gain  
25  
26 insight into potential failure of a frame, other definitions of failure must be investigated.  
27  
28 Excessive loss of stiffness is the most obvious candidate, because it leads to structural failure  
29  
30 through instability or to functional failure through excessive drift. (The test set-up precluded  
31  
32 instability, because the column was held stationary and the load remained vertical). The joint  
33  
34 stiffness influences both behaviors, so its value is of interest. In addition, the frame performance  
35  
36 depends on the damage sustained by the other frame components (Pagni and Lowes 2004). The  
37  
38 results from Walker (2001) and Alire (2002) demonstrated that an increase in either the joint  
39  
40 shear stress demand or the damage state results in an increase in the contribution of the joint  
41  
42 deformation to the drift. Therefore, evaluation of the seismic performance of existing frames  
43  
44 requires relationships among the joint stiffness, the shear stress demand and the damage state.  
45  
46  
47  
48  
49  
50

51  
52 The joint stiffness degrades with cycling in a complicated manner and was the subject of  
53  
54 a separate enquiry (Anderson et al., 2008). However, to facilitate immediate implementation in  
55  
56 existing professional structural analysis software, a simple model intended to capture the major  
57  
58 trends of the response was developed. For each of the eleven specimens tested, the secant  
59  
60  
61  
62  
63  
64  
65

1  
2  
3  
4 stiffness of the joint was computed at critical stages of the load history. These were: First  
5  
6 Cracking at the center of the joint, First Yield in the beam bars, and Initial Spalling of the joint.  
7  
8 In each case, the stiffness is expressed as a shear modulus ratio  $G_{sec}/G_{el}$ , where  $G_{sec}$  and  $G_{el}$  are  
9  
10 respectively the instantaneous secant and the (uncracked) elastic shear moduli of the joint. The  
11  
12 secant stiffness was computed from the joint shear stress and strain and was evaluated only at the  
13  
14 first peak to a new drift level. Joint shear stress-strain envelope curves, defined by these points,  
15  
16 are shown in Figure 11. Estimates of  $G_{sec}$  at different strain levels can be obtained from that  
17  
18 figure. In the following discussion, only the values for the SCDH specimens are used in order to  
19  
20 avoid the influence of loading histories.  
21  
22  
23  
24

25  
26 The modulus ratio  $G_{sec}/G_{el}$  was computed for each of the SCDH specimens, including  
27  
28 those from Series 1, and its mean and coefficient of variation were obtained for each damage  
29  
30 state. Specimen SCDH-0850 was excluded from the statistics because its behavior differed  
31  
32 significantly from that of the others. At first cracking,  $G_{sec}/G_{el}$  had a mean and COV of 0.32 and  
33  
34 42%, respectively. At Initial Spalling it had a mean and COV of 0.055 and 30% respectively.  
35  
36  
37

38 At First Yield (Yielding damage state), the stiffness ratio  $G_{sec}/G_{el}$  was found to vary with  
39  
40 the joint shear stress demand, which in turn is a function of the flexural steel ratio of the beams.  
41  
42 An equation was developed to relate  $G_{sec}/G_{el}$  at first yield to the nominal joint shear stress. Its  
43  
44 form was first obtained from the fact that the drift at first yield was found to be approximately  
45  
46 linearly related to the joint shear stress. However, it can be shown (Alire 2002) that the  
47  
48 contribution to the drift of beam curvature at first yield is a function of the beam depth and the  
49  
50 yield strain of the bars, but is almost independent of the beam strength. By assuming this, and  
51  
52 that the column contribution to drift was 2/3 of its yield value (since  $M_{n,col}/M_{n,beam}$  was designed  
53  
54  
55  
56  
57  
58  
59  
60  
61  
62  
63  
64  
65

1  
2  
3  
4 to be approximately 1.5), and by assigning the remaining deformation to joint shear, an equation  
5  
6 for the joint secant shear modulus of the form  
7

$$\frac{G_{\text{sec}}}{G_{\text{el}}} = \frac{c_1}{(1 - c_2/v_j)} \leq 0.32 \quad (1)$$

8  
9  
10  
11  
12 was derived. Fitting this equation to the measured joint shear stress and strain data led to best fit  
13  
14 values of  $c_1 = 0.039$  and  $c_2 = 3.5$  MPa.  
15  
16

17  
18 The shear modulus ratios (for all specimens, including those tested by Walker (2001)) are  
19  
20 plotted against the joint shear stress,  $v_j$ , in Figure 12. This approach is necessarily approximate.  
21  
22 However, in the short-term absence of a better joint model, it provides practicing engineers with  
23  
24 an approximate way of including joint deformations in frame analyses. The fact that the joint  
25  
26 deformations represent a significant fraction of the total drift shows that approximating it is an  
27  
28 improvement over ignoring it. The importance of joint flexibility is indicated by the fact that,  
29  
30 even prior to visible cracking, the joint shear stiffness is only 32% of its gross value.  
31  
32  
33  
34  
35

## 36 **SUMMARY AND CONCLUSIONS**

37  
38  
39 A program of experiments was conducted on reinforced concrete beam-column joints  
40  
41 without transverse reinforcement. From qualitative observations and analyses of the measured  
42  
43 data, probabilistic relationships were developed that correlated EDPs to pre-defined damage  
44  
45 states. Approximate values of the effective joint secant shear modulus were developed for joints  
46  
47 with a range of joint shear stress demands at three different levels of damage. The joint  
48  
49 stiffnesses derivable from these shear moduli are suitable for immediate use in frame analyses of  
50  
51 older buildings with joints without transverse reinforcement.  
52  
53  
54

55  
56 The experimental results led to the following conclusions:  
57  
58  
59  
60  
61  
62  
63  
64  
65

- 1  
2  
3  
4 1. The beam-column joints tested were subjected to nominal joint shear stresses that  
5  
6 varied from  $0.47\sqrt{f_c}$  to  $2.41\sqrt{f_c}$  MPa. In all cases the joint incurred serious damage.  
7  
8
- 9  
10 2. Larger shear stress demands lead to more severe damage and faster damage  
11  
12 accumulation.  
13
- 14 3. Joint shear stress capacity is not a function of concrete compressive strength alone, as  
15  
16 current seismic design and evaluation provisions suggest. The other parameters found  
17  
18 to influence the peak joint shear stress include: cyclic loading history, joint shear  
19  
20 stress demand, extent of beam bar yielding, and bond capacity.  
21  
22
- 23  
24 4. Specimen SCDH-0850 was designed and tested with the intention of determining a  
25  
26 joint shear stress demand below which no joint damage would occur, thereby forcing  
27  
28 all of the nonlinear behavior into the plastic hinges at the ends of the beams. If such a  
29  
30 threshold joint shear stress exists, it lies below the nominal shear stress demand of  
31  
32  $0.47\sqrt{f_c}$  MPa experienced by this specimen. However, it is likely to lie close to this  
33  
34 limit, because joint damage in Specimen SCDH-0850 was much delayed in  
35  
36 comparison with that in other specimens.  
37  
38
- 39  
40 5. The nominal joint shear stress of  $2.41\sqrt{f_c}$  MPa sustained by Specimen SCDH-4150 is  
41  
42 believed to be close to the maximum achievable value under any loading. In most  
43  
44 specimens significant joint damage started only when the beam bars yielded, but in  
45  
46 Specimen SCDH-4150 the beam bars only just yielded at the end of the test, by which  
47  
48 time significant joint damage had already occurred.  
49  
50
- 51  
52 6. First cracking of the joint correlated most closely with joint shear stress, and on  
53  
54 average, occurred at a joint shear stress of  $0.86f_c$ .  
55  
56  
57  
58  
59  
60  
61  
62  
63  
64  
65

- 1  
2  
3  
4  
5  
6  
7  
8  
9  
10  
11  
12  
13  
14  
15  
16  
17  
18  
19  
20  
21  
22  
23  
24  
25  
26  
27  
28  
29  
30  
31  
32  
33  
34  
35  
36  
37  
38  
39  
40  
41  
42  
43  
44  
45  
46  
47  
48  
49
7. Damage states associated with different levels of spalling were reached after different numbers of cycles but they correlated most closely with joint shear strain. For a given deformation history, higher joint shear stresses caused the damage states to be reached earlier. Initial Spalling occurred at a mean joint shear strain of 0.011 rad. The joint shear strain at Extreme Spalling varied among specimens from 0.022 to 0.040 rad. with a mean of 0.035 rad. for all specimens and 0.026 rad. for specimens subjected to the same drift history. These strains corresponded to drift ratios in the range 2% to 5%.
  8. The joint shear deformation and the beam bar pullout both contribute significantly to the total drift. Frame analyses that treat the joint as rigid, as is commonly done in practice, will under-estimate the true drift for a given load and will not provide a reliable estimate of the frame performance.
  9. Values for the secant joint stiffness were derived as fractions of the elastic shear modulus,  $G_{el}$ , for different damage states. In the absence of a more sophisticated model, they are suitable for inclusion in frame analyses to approximate the true flexibility of the system. Mean shear modulus values of  $0.32G_{el}$  at first cracking and  $0.055 G_{el}$  at initial spalling were found. At first yield, the secant stiffness varied with joint shear stress demand and an equation was developed to relate  $G_{sec}/G_{el}$  to  $v_j$ .

## 50 **ACKNOWLEDGEMENTS**

51  
52 Funding for the experimental testing was provided by NSF under Award Number EEC-  
53  
54 9701568 through the PEER center. The Department of Civil and Environmental Engineering at  
55  
56 the University of Washington (UW) supported the graduate studies of the first author. Meredith  
57  
58 Anderson and Brad Johnson, UW graduate and undergraduate students, respectively, helped with  
59  
60  
61  
62  
63  
64  
65

1  
2  
3  
4 the experimental program; their efforts are gratefully acknowledged. The authors would also  
5  
6 like to thank the UW laboratory staff, Vince Chaijaroen and Kenny Knowlan, PEER REU Susan  
7  
8 Smelnek and Student Assistant V.J. Chaijaroen for their assistance.  
9

## 10 11 12 **REFERENCES** 13

14  
15 ACI Committee 318 (2008). "Building Code Requirements for Structural Concrete (ACI 318-08)  
16  
17 and Commentary (ACI 318R-08): An ACI Standard," American Concrete Institute,  
18  
19 Farmington Hills, MI., 2008  
20

21  
22 ASCE (2007) "Seismic Rehabilitation of Existing Buildings, ASCE/SEI 41-06", American  
23  
24 Society of Civil Engineers, 416 p.  
25

26  
27 Alire, D.A. (2002). "Seismic Evaluation of Existing Unconfined Reinforced Concrete Beam-  
28  
29 Column Joints", MSCE thesis, University of Washington, Seattle, 250 p.  
30

31  
32 Anderson, M.R., Lehman, D.E. and Stanton, J.F. (2008). "A Cyclic Shear Stress-Strain Model  
33  
34 for Joints in Older Reinforced Concrete Frames". Engineering Structures, vol 30, No. 4,  
35  
36 April 2008, pp. 941 – 954.  
37

38  
39 FEMA Publication 356 (2000). "Prestandard and Commentary for the Seismic Rehabilitation of  
40  
41 Buildings", Building Seismic Safety Council, Washington, D.C., November.  
42

43  
44 IBC (2003) International Building Code International Conference of Building Officials, Whittier,  
45  
46 California, U.S.A., 2003  
47

48  
49 Meinheit, D. and Jirsa, J. (1977) Shear Strength of Joints Austin : Dept. of Civil Engineering,  
50  
51 Structures Research Laboratory, the University of Texas at Austin, 1977  
52

53  
54 Mosier, G. (2000). "Seismic Assessment of Reinforced Concrete Beam-Column Joints". MSCE  
55  
56 thesis, University of Washington, Seattle. 218 p.  
57

58  
59 NEES-GC (2009) <http://peer.berkeley.edu/grandchallenge/index.html>  
60  
61

1  
2  
3  
4 NZS 3101:06 (2006) New Zealand Concrete Standard Part 1-The Design of Concrete Structures,  
5  
6 1995  
7

8  
9 Pagni, C. A., and Lowes, L. N. (2006). "Fragility Functions for Older Reinforced Concrete  
10 Beam-Column Joints." Earthquake Spectra, Vol. 22, No. 1, pp. 215-238.  
11

12  
13 Raynor, D.J. (2001). "Bond Assessment of Hybrid Frame Continuity Reinforcement". MSCE  
14 thesis, University of Washington, Seattle. 248 p.  
15

16  
17 Walker, S.G. (2001). "Seismic Performance of Existing Reinforced Concrete Beam-Column  
18 Joints". MSCE Thesis, University of Washington, Seattle. 308 p.  
19

20  
21 Wood, S. (1992). "Evaluation of the Long-Term Properties of Concrete", Research and  
22 Development Bulletin RD102, Portland Cement Association, 1992, 99 pages.  
23

## 24 25 26 27 28 29 30 31 NOTATION LIST

32  
33  $d_b$  = bar diameter  
34

35  $f'_c$  = specified concrete strength  
36

37  $f_r$  = modulus of rupture of concrete  
38

39  $G_{el}$  = elastic shear modulus of uncracked concrete  
40

41  $G_{sec}$  = secant shear modulus of concrete  
42

43  $h_c$  = column depth  
44

45  $v_j$  = joint shear stress  
46

47  $\gamma_j$  = joint shear strain  
48  
49  
50  
51  
52  
53  
54  
55  
56  
57  
58  
59  
60  
61  
62  
63  
64  
65

Figure 1

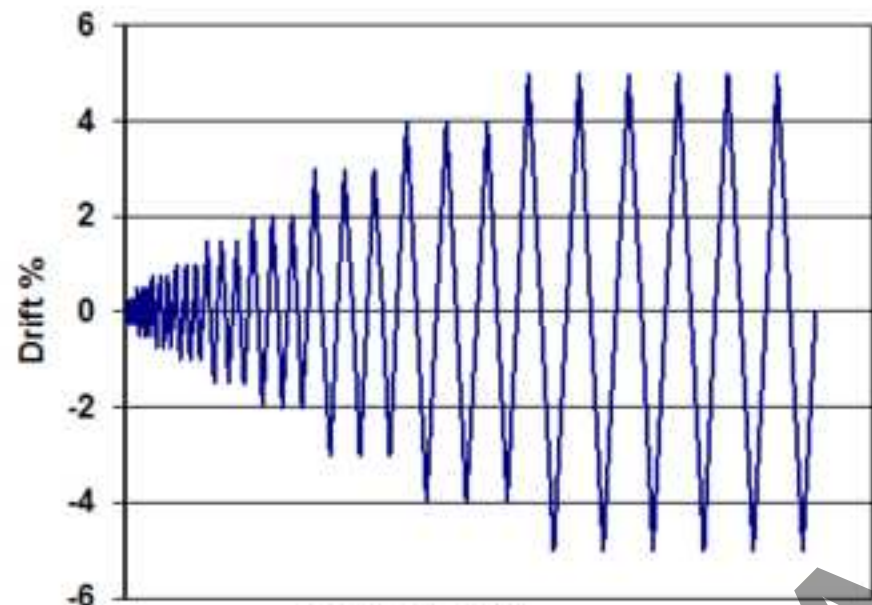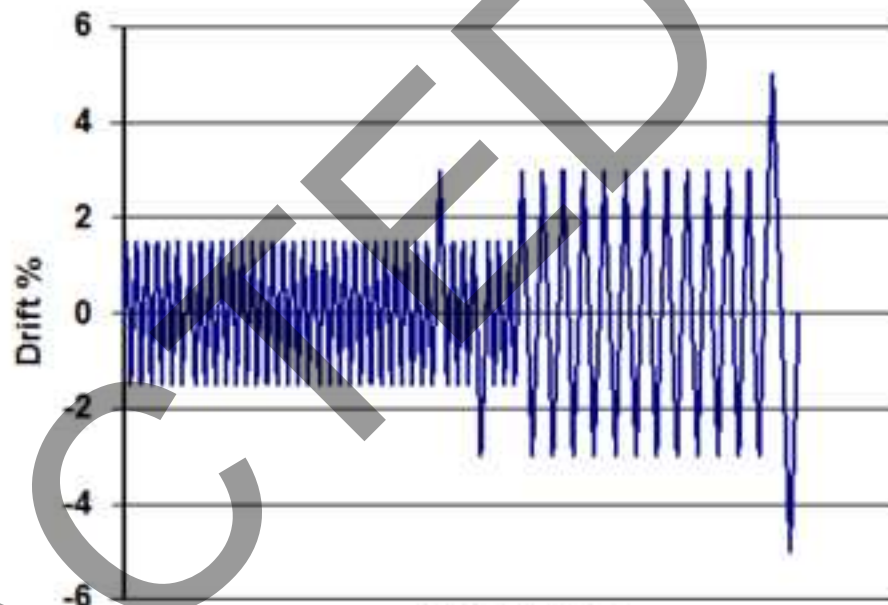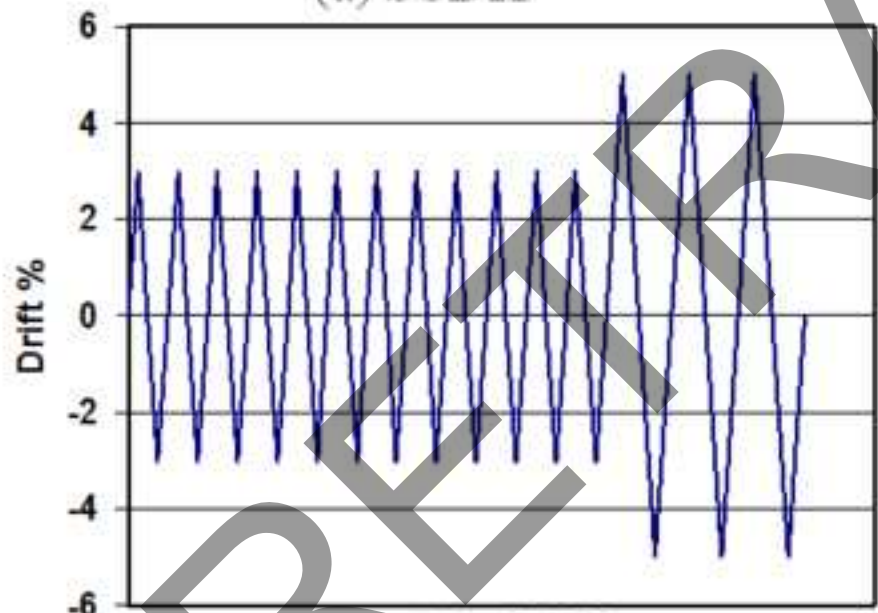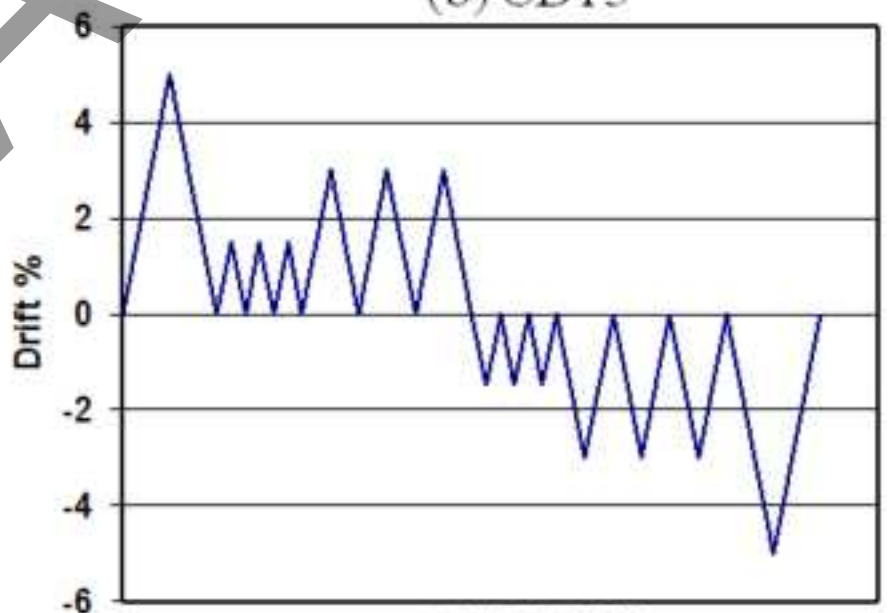



Figure 2

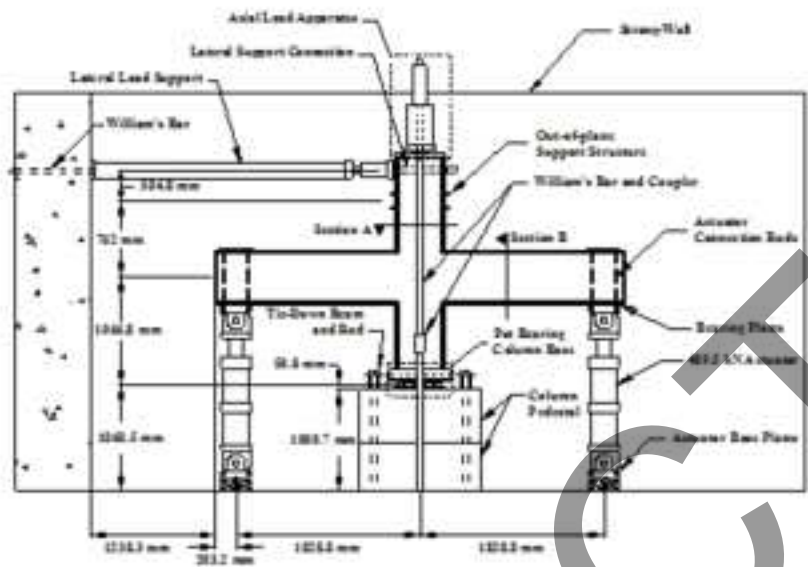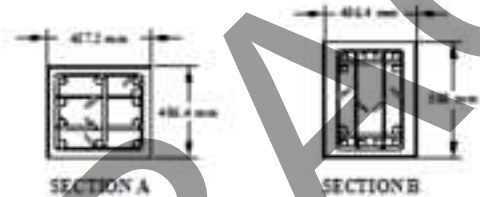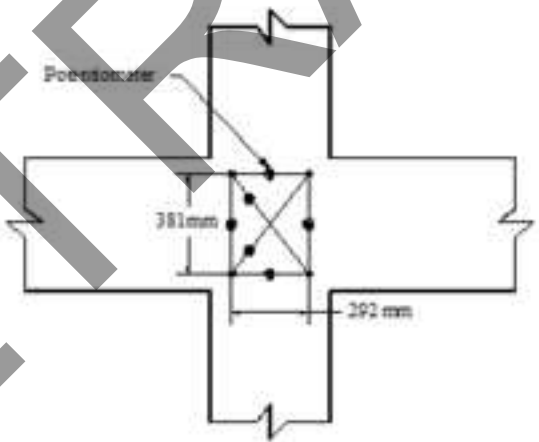

Figure 3

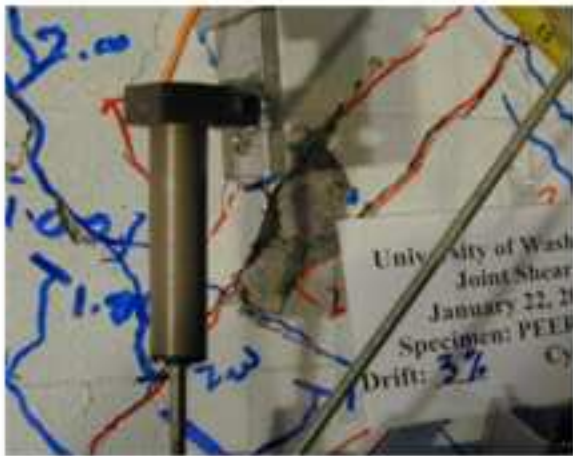

(a) Initial spalling

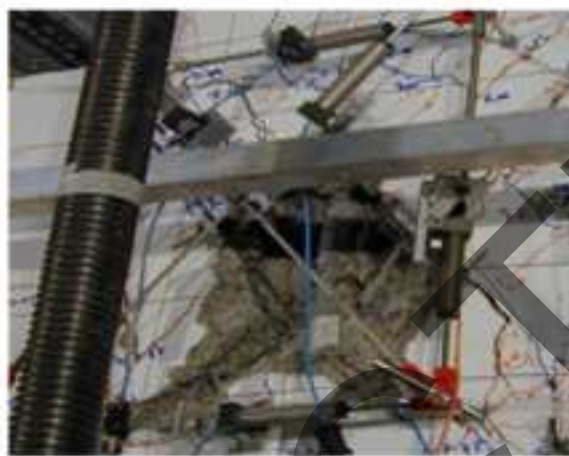

(b) Extreme spalling

RETRACTED

Figure 4

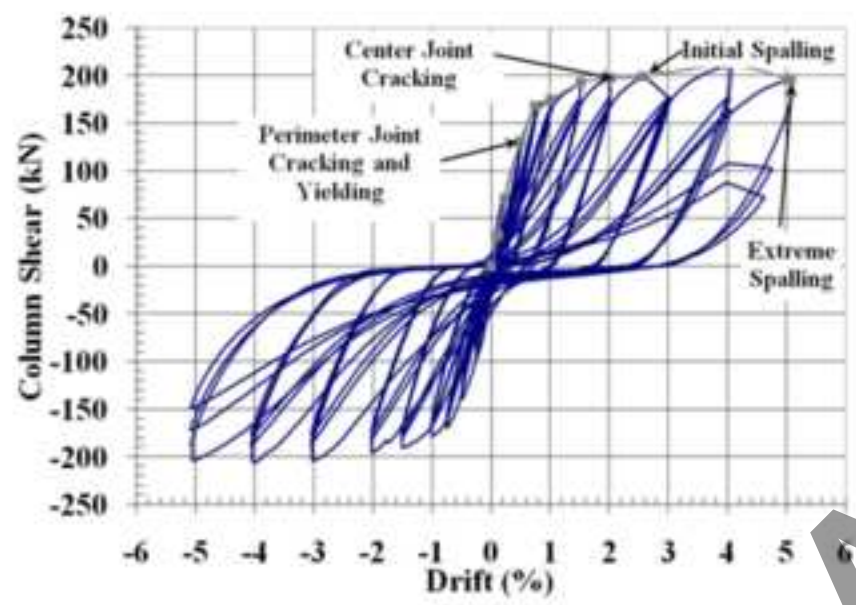

(a) SCDH-0850

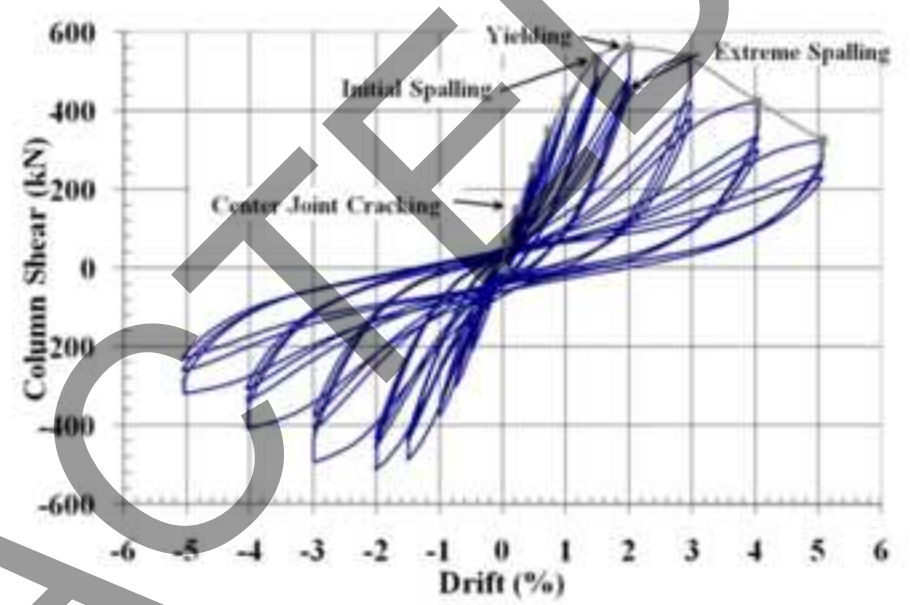

(b) SCDH-4150

RETRACTED

Figure 5

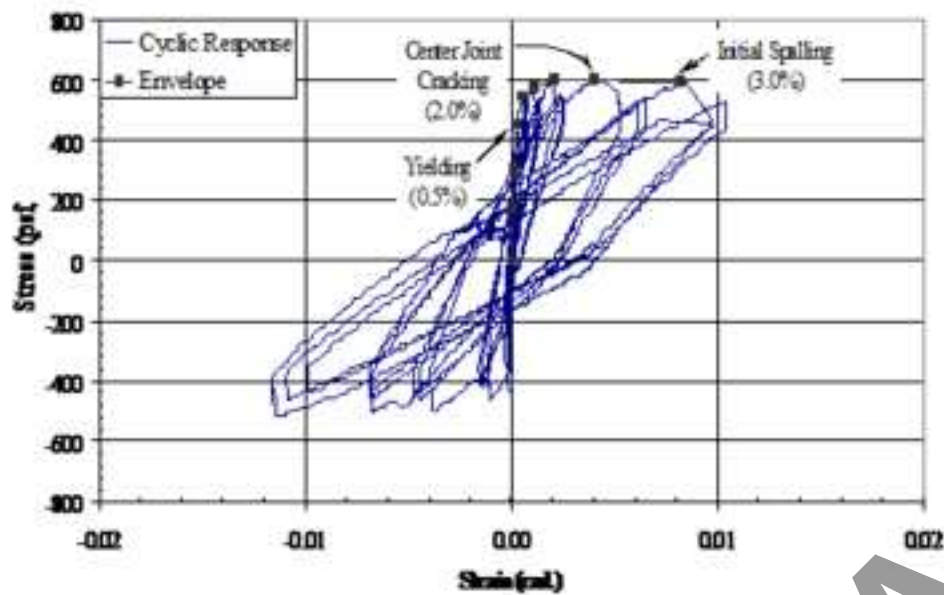

(a) Specimen SCDH-0850

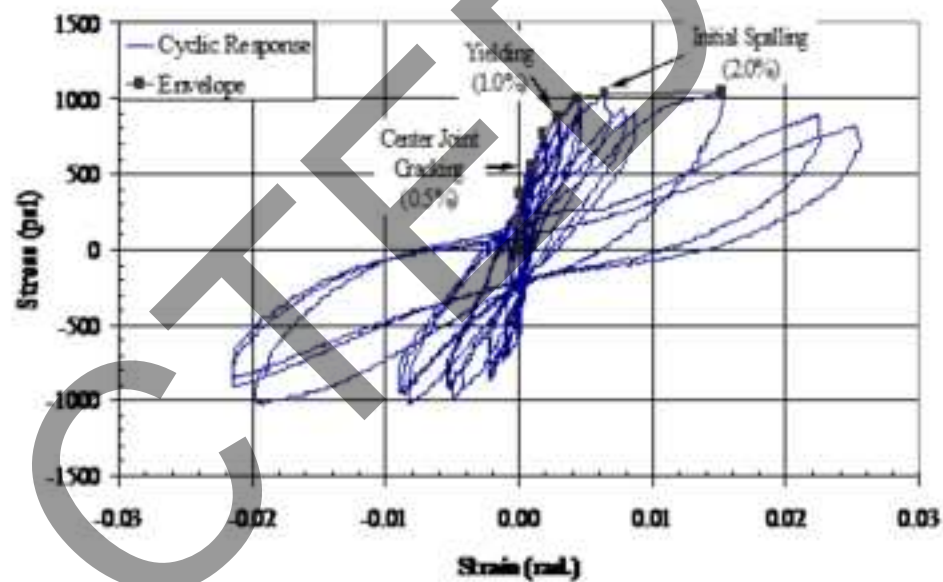

(b) Specimen SCDH-0995

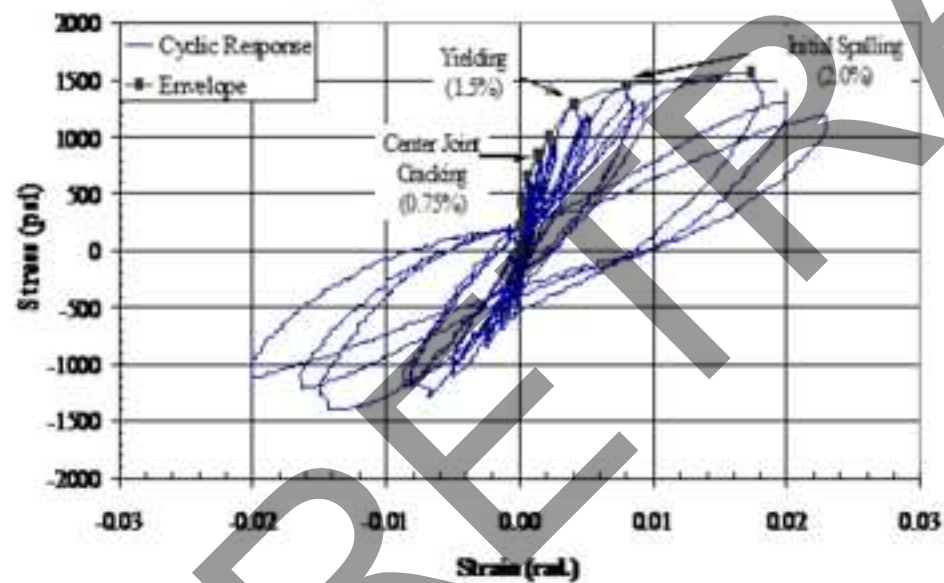

(c) Specimen SCDH-1595

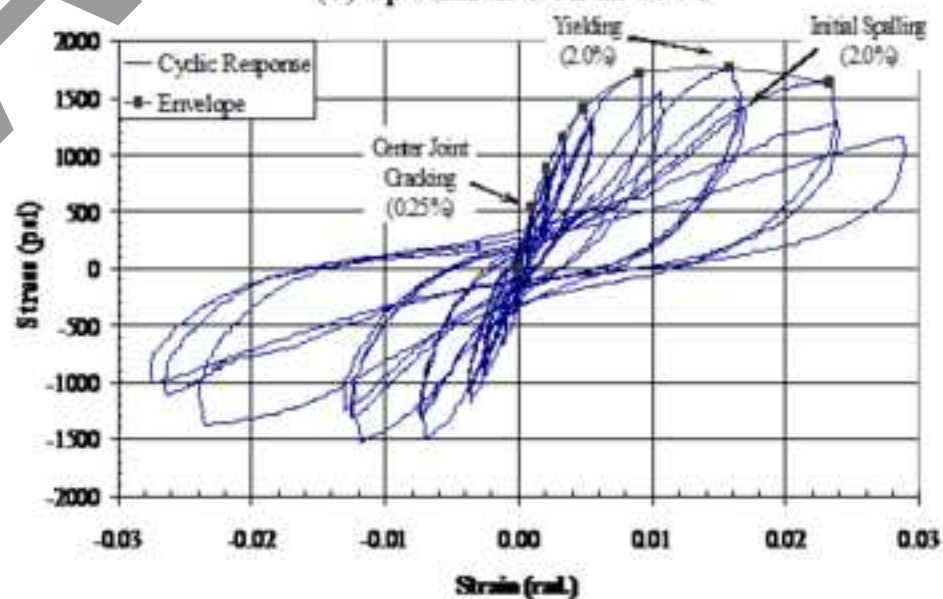

(d) Specimen SCDH-4150

Figure 6

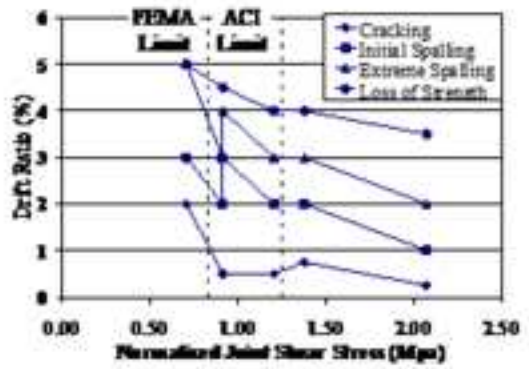

RETRACTED

Figure 7

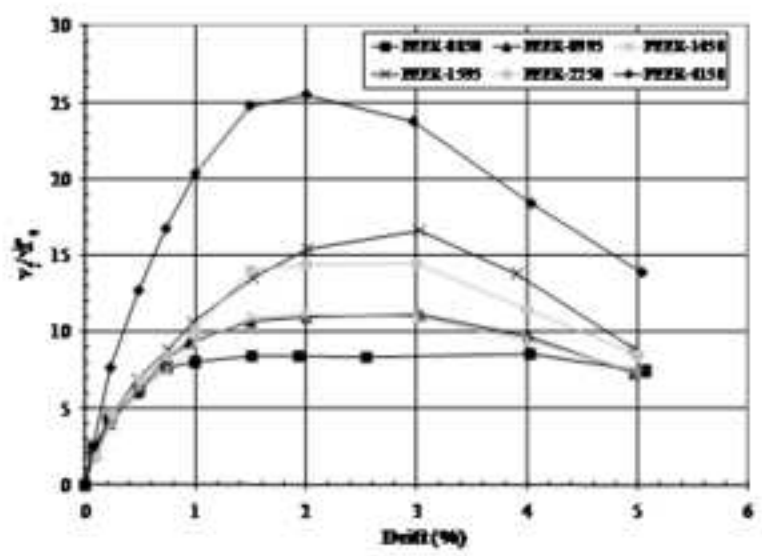

RETRACTED

Figure 8

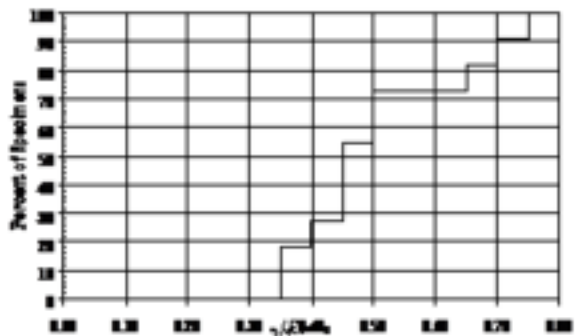

RETRACTED

Figure 9

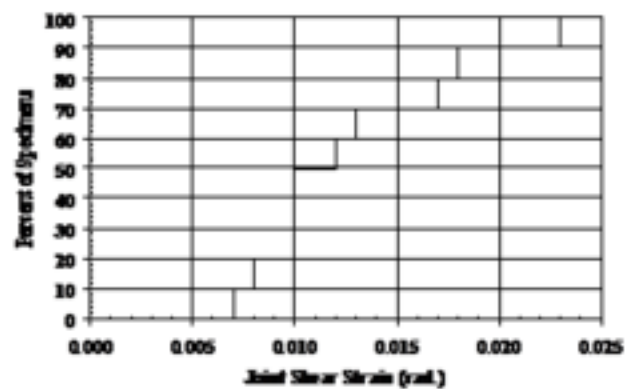

RETRACTED



Figure 10

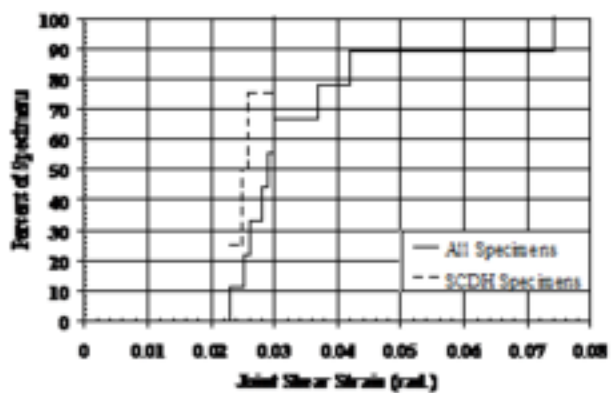

RETRACTED

Figure 11

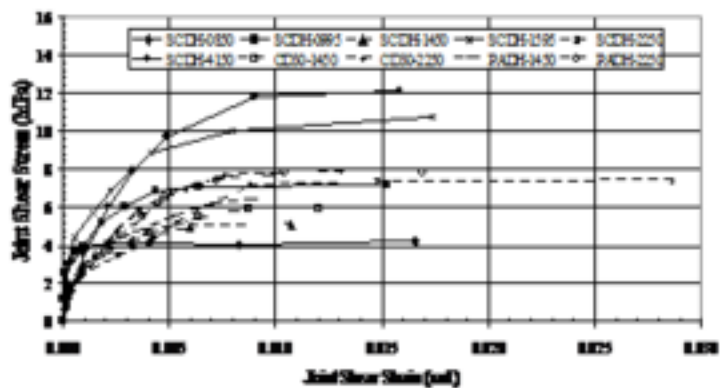

RETRACTED

Figure 12

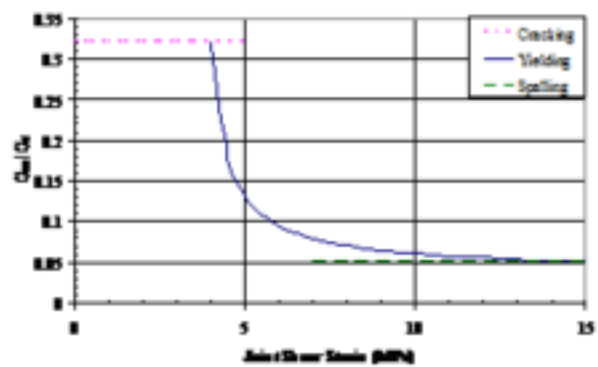

RETRACTED

**Figure Titles Alire et al.**

**Figure 1.** Displacement Histories

**Figure 2.** Test Setup, Specimen Geometry, and Joint Instrumentation

**Figure 3.** Illustration of (a) Initial Spalling, (b) Extensive Spalling

**Figure 4.** Force-drift response curves

**Figure 5.** Joint shear stress-joint shear strain responses for Series 2 specimens

**Figure 6.** Relationship among drift ratio, measured joint shear stress, and damage states for SCDH specimens

**Figure 7.** Normalized joint shear stress vs. drift ratio envelopes

**Figure 8.** CPC for normalized joint shear stress at Center Joint Cracking.

**Figure 9.** CPC for Joint shear strain at Initial Spalling

**Figure 10.** CPC for Joint shear strain at Extreme Spalling

**Figure 11.** Joint shear stress-strain envelopes

**Figure 12.** Joint shear modulus ratio
